# Supplementary material for: Anatomic shoulder replacement for primary osteoarthritis in patients over 80 years: Outcome is as good as in younger patients
Source: PubMed Central journal article supplement — Acta Orthop. 2015 May 13;86(3):298–302. doi: 10.3109/17453674.2015.1006036 (PMC4443470; doi:10.3109/17453674.2015.1006036), 2015-05-13
Supplement: ORT-86-298-s7797.pdf [file ORT-86-298-s7797.pdf]

## Supplementary article data

# Anatomic shoulder replacement for primary osteoarthritis in patients over 80 years

## Outcome is as good as in younger patients

Iker IRIBERRI<sup>1, a</sup>, Christian CANDRIAN<sup>2, a</sup>, Michael T FREEHILL<sup>3</sup>, Patric RAISS<sup>4</sup>, Pascal BOILEAU<sup>5</sup>, and Gilles WALCH<sup>6</sup>

<sup>1</sup> Department of Orthopaedic Surgery, Centre Hospitalier de Saint-Palais, Saint-Palais, Pays Basque, France; <sup>2</sup> Department of Surgery and Orthopaedic Surgery, Ospedale Regionale, Lugano, Switzerland; <sup>3</sup> Department of Orthopaedic Surgery, Wake Forest University Baptist Medical Center, Winston-Salem, NC, USA; <sup>4</sup> Clinic for Orthopaedic and Trauma Surgery, University of Heidelberg, Heidelberg, Germany; <sup>5</sup> Department of Orthopaedic Surgery and Sports Traumatology, Hôpital de L'Archet-University of Nice Sophia-Antipolis, Nice, France; <sup>6</sup> Unité EpauLe, Centre Orthopédique Santy-Hôpital Privé Jean Mermoz, Lyon, France.

<sup>a</sup> Both authors contributed equally.

Correspondence: ikeririberri@hotmail.com

Submitted 2014-07-25. Accepted 2014-11-18.

Table 4. Comparison of preoperative and postoperative active and passive range of motion, expressed as mean and range, and the significance for the difference between groups

|                                         | Group | Preoperative    | p-value | Postoperative    | p-value | Progression     | p-value |
|-----------------------------------------|-------|-----------------|---------|------------------|---------|-----------------|---------|
| Active anterior elevation               | O     | 90 (30 to 140)  | 0.07    | 143 (30 to 170)  | 0.5     | 53 (-80 to 120) | 0.4     |
|                                         | Y     | 101 (60 to 150) |         | 152 (90 to 180)  |         | 50 (-20 to 120) |         |
| Passive anterior elevation <sup>a</sup> | O     | 95 (60 to 160)  | 0.005   | 148 (90 to 180)  | 0.06    | 51 (-20 to 100) | 0.3     |
|                                         | Y     | 115 (60 to 160) |         | 162 (130 to 180) |         | 47 (0 to 100)   |         |
| External rotation at side, active       | O     | 10 (-10 to 40)  | 0.3     | 36 (10 to 80)    | 0.62    | 26 (-10 to 70)  | 0.5     |
|                                         | Y     | 7 (-20 to 30)   |         | 37 (5 to 60)     |         | 30 (0 to 60)    |         |
| External rotation at side, passive      | O     | 12 (-10 to 40)  | 0.4     | 35 (10 to 70)    | 0.12    | 23 (-10 to 50)  | 0.4     |
|                                         | Y     | 16 (-10 to 50)  |         | 42 (5 to 60)     |         | 27 (-10 to 60)  |         |

<sup>a</sup> Statistically significant.
